# SLEEP AND CONDITIONING OF THE SIPHON WITHDRAWAL REFLEX IN APLYSIA

KATHRIN I. THIEDE<sup>1</sup>, JAN BORN<sup>1,2</sup> AND ALBRECHT P. A. VORSTER<sup>1,3\*</sup>

<sup>1</sup>INSTITUTE OF MEDICAL PSYCHOLOGY AND BEHAVIORAL NEUROBIOLOGY AND CENTER FOR INTEGRATIVE NEUROSCIENCE CIN, UNIVERSITY OF TÜBINGEN, TÜBINGEN, GERMANY

<sup>2</sup>GERMAN CENTER FOR DIABETES RESEARCH (DZD), INSTITUTE FOR DIABETES RESEARCH & METABOLIC DISEASES OF THE HELMHOLTZ CENTER MUNICH AT THE UNIVERSITY TÜBINGEN (IDM), GERMANY

<sup>3</sup>TRAINING CENTRE OF NEUROSCIENCE (GTC) / INTERNATIONAL MAX PLANCK RESEARCH SCHOOL (IMPRS) AT THE UNIVERSITY OF TÜBINGEN

KATHRIN THIEDE  
INSTITUT FÜR MEDIZINISCHE PSYCHOLOGIE UND VERHALTENSNEUROBIOLOGIE  
SILCHERSTR. 5  
72076 TÜBINGEN  
GERMANY  
KATHRIN.THIEDE@GMX.NET

JAN BORN  
INSTITUT FÜR MEDIZINISCHE PSYCHOLOGIE UND VERHALTENSNEUROBIOLOGIE  
OTFRIED-MÜLLER-STRASSE 25  
72076 TÜBINGEN  
GERMANY

\*CORRESPONDING AUTHOR:  
ALBRECHT VORSTER  
INSTITUT FÜR MEDIZINISCHE PSYCHOLOGIE UND VERHALTENSNEUROBIOLOGIE  
SILCHERSTR. 5  
72076 TÜBINGEN  
GERMANY  
ALBRECHT.VORSTER@INSEL.CH

## Abstract

Sleep is essential for memory consolidation after learning as shown in mammals and invertebrates such as bees and flies. *Aplysia californica* displays sleep and sleep in this mollusk was also found to support memory for an operant conditioning task. Here, we investigated whether sleep in *Aplysia* is also required for memory consolidation in a simpler type of learning, i.e., the conditioning of the siphon withdrawal reflex. Two groups of animals (Wake, Sleep, each n=11) were conditioned on the siphon withdrawal reflex with the training following a classical conditioning procedure where an electrical tail shock served as unconditioned stimulus (US) and a tactile stimulus to the siphon as conditioned stimulus (CS). Responses to the CS were tested before (Pre-test), 24 and 48 hours after training. While Wake animals remained awake for 6 hours after training, Sleep animals had undisturbed sleep. The 24h-test in both groups was combined with extinction training, i.e., the extended presentation of the CS alone over two blocks. At the 24h-test, siphon withdrawal durations to the CS were distinctly enhanced in both Sleep and Wake groups with no significant difference between groups, consistent with the view that consolidation of a simple conditioned reflex response does not require post-training sleep. Surprisingly, extinction training did not reverse the enhancement of responses to the CS. On the contrary, at the 48h-test, withdrawal durations to the CS were even further enhanced across both groups. This suggests that processes of sensitization, an even simpler non-associative type of learning, contributed to the withdrawal responses. Our study provides evidence for the hypothesis that sleep preferentially benefits consolidation of more complex learning paradigms than conditioning of simple reflexes.

**Keywords** *Aplysia*, classical conditioning, sensitization, sleep, memory consolidation, invertebrate, mollusk

## Introduction

Without doubt sleep plays an important role in memory consolidation (Rasch and Born, 2013, Vorster and Born, 2015, Donlea, 2019). The formation of adaptive long-term memory appears to be one of the major functions of sleep (Klinzing et al., 2019). Sleep seems to support memory formation through an active systems consolidation process where the repeated neuronal reactivation of newly encoded memories transforms these memory representations such that they become more abstract and schema-like, and more easily retrievable in different conditions (Dudai et al., 2015, Klinzing et al., 2019). However it is debatable whether the memory enhancing effect of sleep applies to all kinds of memory. Whereas sleep seems to be fundamentally necessary for higher forms of learning including episodic and procedural memories as well as operant conditioning, it has been hypothesized that simpler types of associative and non-associative learning like classical conditioning, sensitization and habituation might not benefit from sleep as they are primarily mediated through synaptic consolidation processes, and do not implicate any systems consolidation and trace transformation (Dudai, 2012, Dudai et al., 2015).

In rodents, consistent evidence has indeed accumulated that sleep supports complex types of learning (e.g., (Sawangjit et al., 2020, Sawangjit et al., 2018, Hunter, 2015, Melo and Ehrlich, 2016, Pace-Schott et al., 2009, Pace-Schott et al., 2012, Silvestri, 2005), whereas findings are inconclusive regarding the role of sleep in more simple forms of learning like cued fear conditioning (Cai et al., 2009, Graves et al., 2003, Kumar and Jha, 2012). A similar picture is found in invertebrates: In *Drosophila*, operant courtship conditioning is enhanced by sleep (Ganguly-Fitzgerald et al., 2006, Donlea et al., 2011, Dissel et al., 2015, Dag et al., 2019), whereas effects of sleep are less consistent with simpler types of learning, such as classical conditioning (Le Glou et al., 2012). In honeybees, Hussaini et al. (2009) did not find a sleep dependency of the classically conditioned proboscis extension response. However its extinction, a more complex form of memory, benefits from sleep. Sleep dependency was also found in a complex pathfinding task for bees (Beyaert et al., 2012), as well as in an odor-associated contextual memory task (Zwaka et al., 2015). The latter study closely paralleled human studies that used contextual odor cues during slow wave sleep to reactivate hippocampal circuits thereby increasing episodic memory retention (Rasch et al., 2007). This suggests

that similar patterns of recurrent activation during sleep might support an active systems consolidation process for complex memories in insects and vertebrates (Vorster and Born, 2018).

The mollusk *Aplysia californica* has been enormously helpful unraveling the synaptic and circuit mechanisms underlying the fundamental forms of learning and memory related to habituation, sensitization, classical conditioning as well as operant conditioning (Hawkins, 2019, Hawkins and Byrne, 2015, Levitan et al., 2012). The sea slug possesses a relatively simple neuronal network, comprised of only about 20,000 neurons that are organized in 5 paired ganglia, which makes it an ideal model organism for studies of the cellular and circuit mechanisms underlying learning and memory (Akhmedov et al., 2014). Notably, sleep was found essential for memory consolidation of inhibitory operant conditioning in *Aplysia* (Vorster and Born, 2017, Krishnan et al., 2016a, Krishnan et al., 2016b). However, simpler forms of learning like classical conditioning have not been evaluated for their dependency on sleep. Classical conditioning in *Aplysia* was first described more than 40 years ago using the siphon withdrawal reflex (Carew et al., 1981a, Carew et al., 1981b, Carew et al., 1983, Hawkins et al., 1986, Hawkins et al., 1989, Hawkins et al., 1998). We here asked, whether the persistence of this classically conditioned reflex in *Aplysia* depends on sleep.

## Methods

### Subjects, design and general procedure

Subjects were 30 *Aplysia californica* (80 - 125 g; South Coast Bio-Marine, San Pedro, CA), entrained to a 12 h/12 h light-dark cycle (lights on at 7:00 h). The *Aplysia* were assigned to a SLEEP group (final n = 11), and a WAKE group (n = 11). All were tested on three occasions: Pre-test, 24h-test and 48h-test. Each of the tests consisted of 7 presentations of the conditioned stimulus (CS, stimulation of the siphon with a chopstick, inter-trial interval - 5 min) and aimed to assess conditioning memory (see below). The Pre-test took place at 14:45, and thus 75 min before the conditioning training starting at 16:00 (Fig. 1A). Conditioning in the WAKE group was followed by sleep deprivation (SD) for 6 hours. The 24h-test taking place at 16:00 on the following day, was extended into an extinction training. Both conditioning and extinction training were thereby timed such that they ended shortly

before the dark phase. The 48h-test took place 48 hours after conditioning and, thus, ~24 hours after extinction training. In order to explore the longevity of the induced memory, in a subset of WAKE group animals an additional test was performed 72 hours after conditioning (72h-test). Conditioning training was performed (by KIT) with the experimenter blinded regarding the animal's experimental condition (SLEEP vs WAKE). Sleep deprivation and test sessions were performed by KIT or AV with, no differences in results between the experimenters.

### **Sleep deprivation**

WAKE group animals were sleep deprived during the first 6 hours of the dark phase following conditioning training. A duration of 6 hours of sleep deprivation was chosen as a compromise because, on one side, the period should be sufficiently long to effectively suppress consolidation but, on the other side, stress the animal as little as possible. The animals were motivated to stay active during this period by presenting the odor of food and gentle handling. If animals did not show any motion for more than 1 min, they were gently displaced by means of a flexible plastic ruler (Vorster and Born, 2017, Vorster and Born, 2018), without touching the siphon. A maximum of 150 min of sleep during this initial 6-h period for WAKE group animals and a minimum of 250 min of sleep for SLEEP group animals were chosen as a priori sleep criteria. In the WAKE group all subjects met the criterion, in the SLEEP group one animal was excluded from analyses, as it did not meet the criterion.

### **Surgeries for siphon withdrawal reflex conditioning**

As in the original experiment by Carew et al. (1981b), parapodia were clipped to attain visibility of the siphon in any relaxed or withdrawn state (parapodectomy). For this, the animals first underwent cold anesthesia, i.e., *Aplysia* were immersed for 7 min in iced artificial sea water at  $-2.5^{\circ}\text{C}$  until the siphon withdrawal reflex could not be elicited. Cold-anaesthetised animals were then laid on one side and the upper parapodial skin was lifted with forceps. A hemostat compressed the skin below the cutting edge, while a stripe of parapodial tissue was cut off, starting from the junction of parapodia and tail (pseudosiphon). This junction is easily mistaken for the siphon, as both feature bright markings.

Cutting as low as possible is thus important to avoid confusion (Fischer et al., 2000). As a guideline for cutting, the white, shining marking at the upper part of the parapodia was used (Supplemental Fig. 1C). We took care not to cut much below this area, as within the fleshier part of the parapodia substantial amount of hemolymph might drain from a resulting skin defect. The procedure was repeated for the other parapodia. Subsequently *Aplysia* were returned to the home tank regaining normal body temperature. Due to cold anesthesia animals showed usually no inking or other aversive reaction after the procedure.

To deliver shocks at equal current in all animals, the snails were implanted with stainless steel wires (15 cm, SS-5T/A, SS-8T/A, SS-10T/HH, Science Products GmbH, Germany) serving as electrodes (thickness: 125  $\mu\text{m}$ , 200  $\mu\text{m}$ , or 150  $\mu\text{m}$ , “flexible” or “half hard”). Due to delivery retardation, it was not possible to use the identical wire in all animals. Yet, it was assured that the resulting current flow did not vary between animals. All wires were coated with Teflon, this provided isolation from sea water. Supplemental Figure 1D depicts details of the implantation process. Two cm apart from one end of the wire, 5 mm of the insulation was stripped to create a contact zone. The wire was implanted with a distance of 4 cm into the left tail region of the anaesthetized, relaxed animal. When animals were back in the home tank and at normal body temperature, they contracted. Thereby the distance of the electrodes was reduced to approximately 1.5 cm. A change in distance, depending on the muscle tonus of the *Aplysia*, was also reported by Carew et al. (1981b). The wire was inserted into the skin of the slugs’s tail by means of hypodermic (hollow) needles. To secure the wire, it was bent in the contact area and both ends stuck out of the animal’s skin. In this way, there was no contact of the bare wire with the sea water and current could only flow between the two wires inside the tissue. Hot glue was put on either end to prevent the electrode from being pulled out accidentally (Supplemental Fig. 1D).

## Conditioning

A classical conditioning paradigm was applied as described by Carew et al. (1981b) that aimed at enhancing the preexisting siphon withdrawal reflex (Fig. 1B). An electric shock (2.8 mA / 1 s / 7 AC; power supply: EA-3051B, EA Elektro-Automatik, Germany) delivered to the animal's tail via implanted stainless steel electrodes (SS-5T/A, Science Products GmbH, Germany) served as unconditioned stimulus (UCS). The unconditioned response (UR) to the shock is a prolonged siphon withdrawal. A constant current level for each animal was ensured by continuously monitoring the current via an amperemeter (MS8229, MASTECH) during US delivery (Supplemental Fig. 1B). To stabilize the flow of current, a 1 k $\Omega$  series resistor was included into the circuit. This intensity was determined in preliminary experiments as the minimal strength, still resulting in reliable conditioning. Current flow was activated by manually holding a pressure switch, that was guided by an audio signal. As conditioned stimulus (CS), a tactile stimulation of the siphon with a wooden chopstick (Fackelmann, Germany) was used which itself provokes only a very brief siphon withdrawal. The chopstick was bent near the top to form hooks of different sizes and angles in order to best reach the siphon in whatever position the slug would be at the time. In detail, the chop stick was inserted into the siphon, touching the inner, upper part and pulling the stick upwards. Thereby the inner part of the siphon skin was touched on the whole way of roughly 1.5 cm to the top. The whole procedure lasted about 0.5 s and was performed similarly to Carew et al. (1981b). The change in behavior after successful conditioning is indicated by a distinctly prolonged duration of the reflexive withdrawal response to the CS. For conditioning (starting 3 hours before the dark period) we followed the scheme of Hawkins et al. (1989). Long-term sensitization of the siphon withdrawal is known to be greater when animals are trained and tested during the day (Fernandez et al., 2003), whereas learning is impaired during the night (Levy et al., 2016). Therefore, we trained and tested our animals prior to the onset of the dark period at 19:00 (corresponding to Zeitgeber Time 9), a time that is marked by increased locomotor activity and arousal (Vorster et al., 2014). We administered two training blocks of 10 CS-US pairings, with an interval of 45 min between the blocks. Each tactile CS was followed after 0.5 s by the electric shock (US). The inter-trial interval was 5 min. Siphon withdrawal was observed for a maximum period of 180 s. To achieve comparability of the two experimental groups with regard

to training performance, animals that exhibited 5 or more trials of  $\geq 180$  s siphon withdrawal duration during conditioning training were excluded from analysis (n=7).

### **Extinction training**

All *Aplysia* underwent extinction training 24 h after conditioning. Extinction training started at 16:00 and overall consisted of 33 presentations of the CS. The first 7 of these 33 trials were the CS presentations used for the 24h-test (inter-trial interval 5 min). These were followed by 6 CS presentations with an interval-trial interval of 2.5 min and – after a 45-min break – a second block of 20 CS presentations (inter-trial interval 2.5 min, Fig. 1C).

### **Behavioral analysis**

All tests and trainings were video-recorded and analyzed off-line. The start of the withdrawal duration was defined as the moment of deepest retraction, and its end when the siphon had reappeared by 80%. All videos were visually scored by the experimenter (KIT), and the results of the Pre-, 24h- and 48h-tests were verified by a second scorer who was blinded as to the experimental conditions (Verena Koppe). Activity was continuously monitored by an infrared camera accompanied by infrared light invisible to the animals (850 nm, SAL 35, B&S Technology, Germany) and analyzed semi-automatically (EthoVision XT 13 Noldus Information Technology, Wageningen, Netherlands). The sleep-like state was scored whenever the animal exhibited no movements for at least 2 min, with the exception of slight rhinophore movements or respiratory pumping and siphon movement. Animals were scored as active when body movements were present especially in the head and neck region. Total light intensity was  $<5$  lux during the dark period and  $>100$  lux during the light period.



## Statistical analysis

For the test occasions the median withdrawal time for an individual animal was used for analysis. Absolute values as well as difference values (with the individual Pre-test value subtracted from the 24h-test or 48h-test value) were compared between the SLEEP and WAKE groups, using unpaired t-tests (with Welch's correction for unequal variances) for comparisons between groups, and paired t-tests for additional comparisons within groups. For differences in variance between groups an F-test was performed. Additional Analyses of Variance (ANOVA) with Sidak's multiple comparisons were run to assess temporal dynamics of conditioning memory in the two groups. Basically, ANOVA included a group factor (SLEEP/WAKE) and repeated measures factors for the time points of testing (Pre-test, 24h-test, 48h-test). Correlations were calculated using the Pearson's product moment correlation coefficient. A p-value < 0.05 was considered significant.

## Results

We asked whether sleep in *Aplysia* supports consolidation of a classical conditioning memory. Both the SLEEP and WAKE group showed a prolonged siphon withdrawal at the 24h-test in comparison with the Pre-test level. The mean ( $\pm$  SEM) increase in withdrawal time (with reference to Pre-test levels) was for the SLEEP group 15.7 s ( $\pm$  3.1 s), and for the WAKE group 37.7 s ( $\pm$  14.3 s), indicating that a persistent memory of the conditioned response was present in both groups (Fig. 2A, B). Although the WAKE group, on average, displayed a larger increase in siphon withdrawal duration, neither this increase ( $p = 0.16$ ) nor absolute withdrawal duration ( $p = 0.19$ ) differed between groups. This appeared to be partly due to the WAKE group showing a remarkable increase in variability in withdrawal duration among the animals at the 24h-test ( $F = 20.95$ ,  $p < 0.0001$ , for the difference in variances between groups), while no such difference in variance was found in the Pre-test of the siphon withdrawal between the SLEEP- and WAKE-group ( $F = 1.213$ ,  $p = 0.7660$ ). During conditioning, the WAKE group showed a slightly longer withdrawal response across trials than the SLEEP group (mean  $\pm$  SEM absolute time: SLEEP  $65.73 \pm 4.20$  s vs. WAKE  $101.2 \pm 4.60$  s, mean  $\pm$

SEM difference conditioning-Pre-test: WAKE  $76.6 \pm 8.4$  s vs. SLEEP  $50.4 \pm 11.9$  s). However, this difference failed to reach significance ( $p = 0.0902$ , Fig. 2C).

Whereas the amount of sleep in WAKE group animals was greatly reduced to an average of 80 min during the 6-h interval after conditioning (range: 0 to 147 min), SLEEP group animals achieved 317 min of sleep (range: 260 to 360 min, Fig. 3A). Still, WAKE group animals did not catch up on sleep loss in the remaining time until the 24h-test. In fact the difference in the amount of sleep persisted up to the 24h-test (mean sleep time  $\pm$  SEM, SLEEP  $829 \pm 31$  min, WAKE  $514 \pm 62$  min,  $p = 0.0004$ ). We also did not find any significant correlation between the amount of sleep (6 h after training) and memory outcome measures at 24h. These correlations were for the increase in siphon duration (Pre-test to 24h-test across both groups  $r = -0.3069$  ( $p = 0.1647$ ), and separately for the SLEEP and WAKE groups  $r = -0.2704$  ( $p = 0.4212$ ) and  $r = 0.0001$  ( $p = 0.9997$ ) (Fig. 3B).

Starting with the 7 test trials of the 24h-test, extinction training took place comprising two blocks of 13 and 20 trials respectively. Responses during extinction training did not show systematic changes in the course of the training (linear regression across trials: SLEEP  $r^2 = 0.0263$ ,  $p = 0.1733$ , WAKE  $r^2 = 0.0025$ ,  $p = 0.6932$ ) and also did not differ between groups ( $p = 0.4020$ ,  $0.1680$ , and  $0.6451$ , for Time and Group main effects and Time  $\times$  Group interaction, respectively, in an ANOVA on the extinction trials, Fig. 2D). Responses at the 48h-test indicated that conditioning memory survived extinction training. At the 48h-test, both the SLEEP and WAKE group still showed a prolonged siphon withdrawal in comparison with Pre-test levels (mean  $\pm$  SEM, SLEEP  $58.7 \pm 21.2$  s, WAKE  $64.9 \pm 17.2$  s, Fig. 2A, B), with no differences between groups ( $p = 0.8229$  and  $0.7862$ , for the increase from Pre-test levels and for absolute durations, respectively). Contrary to our expectation, siphon withdrawal duration did not decrease, but had further increased 24 hours after the extinction training, i.e., at the 48h-test in comparison with the 24h-test ( $F_{(1,20)} = 6.931$ ,  $p = 0.016$ , for effect of Time in a 24h-test/48h-test  $\times$  SLEEP/WAKE ANOVA,  $p = 0.4252$  and  $0.5582$ , for main effect of SLEEP/WAKE and SLEEP/WAKE  $\times$  24h-test/48h-test interaction, respectively). The absolute increase in withdrawal duration from the 24h to the 48h-test was comparable in both groups (mean  $\pm$  SEM difference from 24h to 48h-test, SLEEP  $43.0 \pm 20.7$  s, WAKE  $27.1 \pm 16.8$  s;  $p = 0.5585$ , Welch's *t*-test). Given the unexpected persistence of the conditioning memory, we tested 9 WAKE group

animals a third time 72 hours after conditioning (Fig. 3C). Still, memory persisted in form of increased siphon withdrawal duration, in comparison with Pre-test levels (mean  $\pm$  SEM increase from Pre-test level,  $66.2 \pm 11.0$  s,  $p = 0.0054$ , for difference between Pre-test and 72h-test). Sleep during the 24 hours following extinction training was comparable between the SLEEP group (797 min, range: 540 - 961 min) and the WAKE group (826 min, range: 401 - 1190 min),  $p = 0.7434$ , Fig. 3A) which implies that the WAKE group did not recover lost sleep also during this period. Accordingly, cumulative sleep duration over the total 48 h was still different between groups (mean  $\pm$  SEM: SLEEP  $1626 \pm 67$  min, WAKE  $1339 \pm 96$  min;  $p = 0.0247$ ).

## Discussion

Here, for studying the effects of sleep on memory consolidation, we adopted a landmark paradigm of classical conditioning of the siphon withdrawal reflex in *Aplysia californica*, which was developed in the 1980's. We found signs of an enhanced memory for the conditioned siphon withdrawal (i.e., prolonged withdrawal time) at a test 24 hours after conditioning training which did not significantly differ between the animals that slept or were kept awake during the 6 hours after conditioning training. Contrary to our expectations, an extinction training introduced 24 hours after conditioning, did not diminish duration of withdrawal responses to the conditioned stimulus (CS). This failure of extinction was observed in both groups, i.e., independently of whether the original conditioning training was followed by sleep or wakefulness. But instead, in both groups at a test 48 hours after conditioning and 24 hours after extinction, withdrawal responses to the CS were even further enhanced. Another unexpected finding was that the *Aplysia* of the WAKE group did not recover sleep (lost during 6-hour post-conditioning period of sleep deprivation) during the following 42 hours.

Our findings confirm previous evidence that conditioning of the siphon withdrawal reflex by pairing a tactile stimulus to the siphon (CS) with an electric shock (US) leads to a prolonged siphon withdrawal duration to the CS with this conditioning memory persisting up to 72 hours (Carew et al., 1981b). Notably, in the present study we used a distinctly lower intensity of the electric shock which was less than a 10th of that used by Carew et al. (3 mA, 1 s in our study vs 50 mA, 1.5 s). In pilot

studies, we found that shocks with current strengths as used in these early experiments harmed the animals and persistently elicited aversive inking. Such an aversive response typically occurring to life threatening stimuli is to be avoided as it can strongly enhance sensitization over classical conditioning. Sensitization refers to an increase in response amplitude occurring solely due to the repetitive presentation of the stimulus. As described by Carew et al. (1981a), Carew et al. (1983), classical conditioning of the siphon withdrawal reflex always holds such a non-associative sensitization component which can mask the conditioning effect. Sensitization effects have to be considered particularly against the backdrop that, unlike in other classical conditioning paradigms (used in other species), siphon withdrawal conditioning uses a CS that itself invokes an, although only brief, (unconditioned) siphon withdrawal response. In a differential conditioning paradigm, Hawkins et al. (1989) showed that in animals trained at higher shock intensity, the sensitization component clearly exceeded the conditioning effect. Against this background, a confounding effect of sensitization processes cannot be excluded for the present findings. Clearly dissociating sensitization from conditioning effects would have required an additional control condition comprising the repetitive presentation of only the shock or, alternatively, a differential conditioning procedure including a CS applied to a different part of the animal, which we did not perform here. Accordingly, it might have been processes of sensitization, rather than classical conditioning, that were enhanced after the conditioning training in our animals independently of sleep or wakefulness. Considering evidence that sensitization is enhanced in conditions of generally increased brain activity and excitability (Barbas et al., 2003, Sutton and Opp, 2014) it might be further argued that sleep deprivation served as an additional sensitizing stressor strengthening the withdrawal reflex memory in our animals. However, although here we did not examine effects of sleep deprivation itself on the unconditioned withdrawal reflex, previous studies employing even longer deprivation intervals (17 h) did not provide hints (such as changes in feeding behavior) that the animals were particularly stressed by the sleep deprivation, in particular when testing took place after a period of recovery sleep (Vorster and Born, 2017).

In an attempt to diminish confounding sensitization processes, we used distinctly lower shock intensities in comparisons with those used by Carew et al. (1981b). Indeed, in pilot studies we did not find robust conditioning if we further reduced shock intensity. Nevertheless, this does not exclude the

presence of sensitization which, moreover, could have been selectively enhanced by post-condition wakefulness whereas sleep might have selectively profited from classical conditioning. The use of distinctly lower shock intensities might be related to another divergence: Unlike Carew et al. (1981b) we did not observe a systematic increase in the duration of the siphon withdrawal response over the course of the conditioning training (Fig. 2C). A related factor that might be of relevance in this context is the Pre-test phase which comprised 7 presentations of the CS and was introduced to follow the original protocol by Carew et al. (1981b). It could be argued that this Pre-test induced habituation thereby altering subsequent conditioning/sensitization and respective consolidation processes. However, exploratory analyses of siphon withdrawal times during the Pre-test did not provide any evidence for a systematic decrease in response during this phase (Supplemental Fig. 2), making it unlikely that habituation substantially added to or interfered with performance during conditioning training.

Our finding that the siphon withdrawal duration at the 24-test did not differ between the SLEEP and WAKE groups is consistent with our hypothesis that simple forms of memory do not need sleep to be consolidated (Vorster and Born, 2015). On average, increases in the duration of the conditioned withdrawal response observed at the 24h-test were even slightly higher in the WAKE than SLEEP group animals, making a statistical type I error – i.e., the false rejection of the null hypothesis based on a too small sample size – highly unlikely. In favor of our conclusion, we also did not reveal a positive association between sleep duration 6 hours after training and siphon withdrawal performance at the 24h-test (Fig. 3B). Data on the effect of sleep on classical conditioning memory in invertebrates is scarce, yet our results are in line with findings in honeybees where classical conditioning of the proboscis extension response was consolidated independently of sleep following conditioning, whereas extinction of the response was enhanced by subsequent sleep (Hussaini et al., 2009).

A sleep dependency of classically conditioned responses was found in *Drosophila* (Le Glou et al., 2012 ), although, in that study, testing additionally required memory transfer of the conditioning context. Thus, those findings appear to be in line with the view that sleep comes into play when more complex representations including contextual aspects are to be formed. Indeed, a sleep-dependency of memory consolidation has also been demonstrated in *Aplysia* in learning paradigms, such as inhibitory

operant conditioning of food intake, that are distinctly more complex than the simple classical conditioning of the siphon withdrawal reflex (Vorster and Born, 2018, Vorster and Born, 2017). This is not to say that classical conditioning is generally less complex than operant conditioning. In fact, with respect to its constituting sub-processes (self- and world-learning) there are operant conditioning paradigms that are probably simpler than the typical classical conditioning task (Brembs et al., 2002, Brembs, 2008, Colomb and Brembs, 2010). Regarding conditioning paradigms, complexity may pertain to differences in the types of behaviors and contexts examined, rather than to the different type of training (operant vs. classical conditioning) used. Thus, feeding behavior is inherently a more complex behavior than a withdrawal reflex, and for this reason one might expect that, unlike the withdrawal reflex, classical conditioning of feeding is a memory that does profit from sleep in *Aplysia* (Lechner et al., 2000). Similarly, classical conditioning to a discrete and simple cue may be considered less complex than context conditioning where the same behavior becomes associated with a contextual configuration of multiple stimulus features. In fact, there is evidence from studies in mammals that sleep preferentially supports the consolidation of contextually integrated memories whereas memories for simple cue-response associations, if at all, only indirectly profit from sleep through their being embedded in a certain context (Sawangjit et al., 2018, Latchoumane et al., 2017). The preferential strengthening of contextually integrated memory is thought to be achieved during sleep by a systems consolidation process that involves a reorganization and displacement of the engram, and that probably can also occur in snails like *Aplysia* (Levitan et al., 2008, Hatakeyama et al., 2006, Braun and Lukowiak, 2011). Assuming that sleep enhances memory through such active systems consolidation (Klinzing et al., 2019, Diekelmann and Born, 2010), no sleep effect would be expected in simple classical conditioning or sensitization of the siphon withdrawal reflex that occurs unconnected to any further contextual stimuli, as it is represented by a few rather local synaptic enhancements without engram reorganization or displacement (Glanzman, 2013).

A straight forward interpretation of our findings, in terms of a sleep-independency of the consolidation of classical conditioning memory, is hampered by two unexpected findings. First, the WAKE animals did not show a rebound of sleep after the 6-hour period sleep deprivation. Consequently, at the 24-hour test they might have been less well rested leading to respective changes in conditioning behavior.

For example, the distinctly increased variance in withdrawal responses in the animals of the WAKE group could reflect such ongoing effects of insufficient sleep. In fact, the missing rebound sleep after sleep deprivation diverging from previous findings (Vorster et al., 2014) is difficult to explain. Since total sleep time remained reduced in the WAKE animals in comparison with the SLEEP animals, also across the whole 48-hour post-conditioning, it might point to an overestimation of the actual presence of sleep in our assessment of sleep (by scoring resting behavior). In this case, the putative rebound sleep in the WAKE animals could have occurred during times when the SLEEP animals just rested but physiologically were not asleep. To confirm this explanation, physiological recordings complementing behavioral recordings are needed. However, if true, insufficient sleep at the 24h-test could be excluded as a factor confounding performance at this test. More generally, it could be also questioned in this context, that preventing sleep for 6 hours was enough to prevent or disturb the consolidation process. The WAKE animals slept on average 80 min during this deprivation period. However, although sleep cannot be completely prevented through sleep deprivation, as even continuous handling will allow for brief periods of local sleep (Vyazovskiy et al., 2011), strong reductions in sleep time comparable with those in the present experiments, have been repeatedly shown to effectively suppress memory consolidation (e.g., (Vorster and Born, 2017, Djonlagic et al., 2012).

The second and more important finding questioning our conclusion that consolidation of the classically conditioned siphon withdrawal reflex is independent of sleep, is the unexpected failure of the extinction training. This finding contrasts with those by Carew et al. (1981b) who report a successful extinction of the classical conditioned siphon withdrawal duration. However, unlike in the present experiments, extinction training by Carew et al. (1981b) occurred directly after conditioning. Specifically, they reported an immediate decrease of the siphon withdrawal duration within 10 extinction trials which was also not observed here in either the SLEEP or WAKE group (Fig. 2D). Possibly, consolidation during the 24-hour interval before the extinction training made the conditioning memory more resistant to extinction. However, extinction training 24 hours after conditioning was found to be successful in other classical conditioning paradigms in *Aplysia* (Colwill et al., 1988, Colwill et al., 1997) as well as in an operant conditioning paradigm (Vorster and Born, 2018). Notably, our extinction training did not only fail to induce a decrease in the duration of

conditioned withdrawal responses but, even further enhanced withdrawal duration. The extinction failure in combination with the increase in withdrawal response with repetitive CS presentations could be taken to argue that siphon withdrawal performance at the 24h-test as well as at the 48h-test was primarily determined by a sensitization processes, rather than reflecting an associative conditioning process. It is important to note here, however, that in comparison with associative classical conditioning, sensitization is an even simpler form of non-associative learning which is assumed to be exclusively mediated by synaptic consolidation processes, rather than involving any systems consolidation processes. Hence, regardless of whether the enhanced withdrawal duration at the 24h-test in *Aplysia* are a consequence of sensitization or associative conditioning processes, the finding can be taken as evidence in support of our basic hypothesis (Vorster and Born, 2015) that sleep is not necessary for the consolidation of memories that originate from simple types of learning and merely involve synaptic consolidation mechanisms.

## Acknowledgements

The authors thank Verena Koppe for her help scoring the Videos and Johanna Klees for assistance with animal maintenance. This research was supported by a Fortune grant of the University of Tübingen to KIT, a grant from the European Research Council (ERC AdG 883098 SleepBalance) to JB and a stipend from the ev. Studienwerk Villigst to APAV.

## References

- AKHMEDOV, K., KADAKKUZHA, B. M. & PUTHANVEETIL, S. V. 2014. *Aplysia* Ganglia preparation for electrophysiological and molecular analyses of single neurons. *J Vis Exp*, e51075.
- BARBAS, D., DESGROSEILLERS, L., CASTELLUCCI, V. F., CAREW, T. J. & MARINESCO, S. 2003. Multiple serotonergic mechanisms contributing to sensitization in *Aplysia*: evidence of diverse serotonin receptor subtypes. *Learn Mem*, 10, 373-86.
- BEYAERT, L., GREGGERS, U. & MENZEL, R. 2012. Honeybees consolidate navigation memory during sleep. *J Exp Biol*, 215, 3981-8.
- BRAUN, M. H. & LUKOWIAK, K. 2011. Intermediate and long-term memory are different at the neuronal level in *Lymnaea stagnalis* (L.). *Neurobiol Learn Mem*, 96, 403-16.



- BREMBS, B. 2008. Operant learning of *Drosophila* at the torque meter. *J Vis Exp*.
- BREMBS, B., LORENZETTI, F. D., REYES, F. D., BAXTER, D. A. & BYRNE, J. H. 2002. Operant reward learning in *Aplysia*: neuronal correlates and mechanisms. *Science*, 296, 1706-9.
- CAI, D. J., SHUMAN, T., HARRISON, E. M., SAGE, J. R. & ANAGNOSTARAS, S. G. 2009. Sleep deprivation and Pavlovian fear conditioning. *Learn Mem*, 16, 595-9.
- CAREW, T. J., HAWKINS, R. D. & KANDEL, E. R. 1983. Differential classical conditioning of a defensive withdrawal reflex in *Aplysia californica*. *Science*, 219, 397-400.
- CAREW, T. J., WALTERS, E. T. & KANDEL, E. R. 1981a. Associative learning in *Aplysia*: cellular correlates supporting a conditioned fear hypothesis. *Science*, 211, 501-4.
- CAREW, T. J., WALTERS, E. T. & KANDEL, E. R. 1981b. Classical conditioning in a simple withdrawal reflex in *Aplysia californica*. *J Neurosci*, 1, 1426-37.
- COLOMB, J. & BREMBS, B. 2010. The biology of psychology: 'Simple' conditioning? *Commun Integr Biol*, 3, 142-5.
- COLWILL, R. M., ABSHER, R. A. & ROBERTS, M. L. 1988. Context-US learning in *Aplysia californica*. *J Neurosci*, 8, 4434-9.
- COLWILL, R. M., GOODRUM, K. & MARTIN, A. 1997. Pavlovian appetitive discriminative conditioning in *Aplysia californica*. *Animal Learning & Behavior*, 25, 268-276.
- DAG, U., LEI, Z., LE, J. Q., WONG, A., BUSHEY, D. & KELEMAN, K. 2019. Neuronal reactivation during post-learning sleep consolidates long-term memory in *Drosophila*. *Elife*, 8.
- DIEKELMANN, S. & BORN, J. 2010. The memory function of sleep. *Nat Rev Neurosci*, 11, 114-26.
- DISSEL, S., ANGADI, V., KIRSZENBLAT, L., SUZUKI, Y., DONLEA, J., KLOSE, M., KOCH, Z., ENGLISH, D., WINSKY-SOMMERER, R., VAN SWINDEREN, B. & SHAW, P. J. 2015. Sleep restores behavioral plasticity to *Drosophila* mutants. *Curr Biol*, 25, 1270-81.
- DJONLAGIC, I., SABOISKY, J., CARUSONA, A., STICKGOLD, R. & MALHOTRA, A. 2012. Increased Sleep Fragmentation Leads to Impaired Off-Line Consolidation of Motor Memories in Humans. *PLOS ONE*, 7, e34106.
- DONLEA, J. M. 2019. Roles for sleep in memory: insights from the fly. *Curr Opin Neurobiol*, 54, 120-126.
- DONLEA, J. M., THINGAN, M. S., SUZUKI, Y., GOTTSCHALK, L. & SHAW, P. J. 2011. Inducing sleep by remote control facilitates memory consolidation in *Drosophila*. *Science*, 332, 1571-6.
- DUDAI, Y. 2012. The restless engram: consolidations never end. *Annu Rev Neurosci*, 35, 227-47.
- DUDAI, Y., KARNI, A. & BORN, J. 2015. The Consolidation and Transformation of Memory. *Neuron*, 88, 20-32.
- FERNANDEZ, R. I., LYONS, L. C., LEVENSON, J., KHABOUR, O. & ESKIN, A. 2003. Circadian modulation of long-term sensitization in *Aplysia*. *Proc Natl Acad Sci U S A*, 100, 14415-20.
- FISCHER, T. M., YUAN, J. W. & CAREW, T. J. 2000. Dynamic regulation of the siphon withdrawal reflex of *Aplysia californica* in response to changes in the ambient tactile environment. *Behav Neurosci*, 114, 1209-22.
- GANGULY-FITZGERALD, I., DONLEA, J. & SHAW, P. J. 2006. Waking experience affects sleep need in *Drosophila*. *Science*, 313, 1775-81.

- GLANZMAN, D. L. 2013. Chapter 17 - Synaptic Mechanisms of Induction and Maintenance of Long-Term Sensitization Memory in Aplysia. In: MENZEL, R. & BENJAMIN, P. R. (eds.) *Handbook of Behavioral Neuroscience*. Elsevier.
- GRAVES, L. A., HELLER, E. A., PACK, A. I. & ABEL, T. 2003. Sleep deprivation selectively impairs memory consolidation for contextual fear conditioning. *Learn Mem*, 10, 168-76.
- HATAKEYAMA, D., SADAMOTO, H., WATANABE, T., WAGATSUMA, A., KOBAYASHI, S., FUJITO, Y., YAMASHITA, M., SAKAKIBARA, M., KEMENES, G. & ITO, E. 2006. Requirement of new protein synthesis of a transcription factor for memory consolidation: paradoxical changes in mRNA and protein levels of C/EBP. *J Mol Biol*, 356, 569-77.
- HAWKINS, R. D. 2019. The contributions and mechanisms of changes in excitability during simple forms of learning in Aplysia. *Neurobiol Learn Mem*, 164, 107049.
- HAWKINS, R. D. & BYRNE, J. H. 2015. Associative learning in invertebrates. *Cold Spring Harb Perspect Biol*, 7.
- HAWKINS, R. D., CAREW, T. J. & KANDEL, E. R. 1986. Effects of interstimulus interval and contingency on classical conditioning of the Aplysia siphon withdrawal reflex. *J Neurosci*, 6, 1695-701.
- HAWKINS, R. D., GREENE, W. & KANDEL, E. R. 1998. Classical conditioning, differential conditioning, and second-order conditioning of the Aplysia gill-withdrawal reflex in a simplified mantle organ preparation. *Behav Neurosci*, 112, 636-45.
- HAWKINS, R. D., LALEVIC, N., CLARK, G. A. & KANDEL, E. R. 1989. Classical conditioning of the Aplysia siphon-withdrawal reflex exhibits response specificity. *Proc Natl Acad Sci U S A*, 86, 7620-4.
- HUNTER, A. S. 2015. Impaired extinction of fear conditioning after REM deprivation is magnified by rearing in an enriched environment. *Neurobiol Learn Mem*, 122, 11-8.
- HUSSAINI, S. A., BOGUSCH, L., LANDGRAF, T. & MENZEL, R. 2009. Sleep deprivation affects extinction but not acquisition memory in honeybees. *Learn Mem*, 16, 698-705.
- KLINZING, J. G., NIETHARD, N. & BORN, J. 2019. Mechanisms of systems memory consolidation during sleep. *Nat Neurosci*, 22, 1598-1610.
- KRISHNAN, H. C., GANDOUR, C. E., RAMOS, J. L., WRINKLE, M. C., SANCHEZ-PACHECO, J. J. & LYONS, L. C. 2016a. Acute Sleep Deprivation Blocks Short- and Long-Term Operant Memory in Aplysia. *Sleep*, 39, 2161-2171.
- KRISHNAN, H. C., NOAKES, E. J. & LYONS, L. C. 2016b. Chronic Sleep Deprivation Differentially Affects Short and Long-term Operant Memory in Aplysia. *Neurobiol Learn Mem*.
- KUMAR, T. & JHA, S. K. 2012. Sleep deprivation impairs consolidation of cued fear memory in rats. *PLoS One*, 7, e47042.
- LATCHOUMANE, C. V., NGO, H. V., BORN, J. & SHIN, H. S. 2017. Thalamic Spindles Promote Memory Formation during Sleep through Triple Phase-Locking of Cortical, Thalamic, and Hippocampal Rhythms. *Neuron*, 95, 424-435.e6.
- LE GLOU, E., SEUGNET, L., SHAW, P. J., PREAT, T. & GOGUEL, V. 2012. Circadian modulation of consolidated memory retrieval following sleep deprivation in Drosophila. *Sleep*, 35, 1377-1384b.
- LECHNER, H. A., BAXTER, D. A. & BYRNE, J. H. 2000. Classical conditioning of feeding in Aplysia: I. Behavioral analysis. *J Neurosci*, 20, 3369-76.
- LEVITAN, D., LYONS, L. C., PERELMAN, A., GREEN, C. L., MOTRO, B., ESKIN, A. & SUSSWEIN, A. J. 2008. Training with inedible food in Aplysia causes expression of C/EBP in the buccal but not cerebral ganglion. *Learn Mem*, 15, 412-6.

- LEVITAN, D., SAADA-MADAR, R., TEPLINSKY, A. & SUSSWEIN, A. J. 2012. Localization of molecular correlates of memory consolidation to buccal ganglia mechanoafferent neurons after learning that food is inedible in *Aplysia*. *Learn Mem*, 19, 503-12.
- LEVY, R., LEVITAN, D. & SUSSWEIN, A. J. 2016. New learning while consolidating memory during sleep is actively blocked by a protein synthesis dependent process. *Elife*, 5.
- MELO, I. & EHRlich, I. 2016. Sleep supports cued fear extinction memory consolidation independent of circadian phase. *Neurobiol Learn Mem*, 132, 9-17.
- PACE-SCHOTT, E. F., MILAD, M. R., ORR, S. P., RAUCH, S. L., STICKGOLD, R. & PITMAN, R. K. 2009. Sleep promotes generalization of extinction of conditioned fear. *Sleep*, 32, 19-26.
- PACE-SCHOTT, E. F., VERGA, P. W., BENNETT, T. S. & SPENCER, R. M. 2012. Sleep promotes consolidation and generalization of extinction learning in simulated exposure therapy for spider fear. *J Psychiatr Res*, 46, 1036-44.
- RASCH, B. & BORN, J. 2013. About sleep's role in memory. *Physiol Rev*, 93, 681-766.
- RASCH, B., BUCHEL, C., GAIS, S. & BORN, J. 2007. Odor cues during slow-wave sleep prompt declarative memory consolidation. *Science*, 315, 1426-9.
- SAWANGJIT, A., OYANEDEL, C. N., NIETHARD, N., BORN, J. & INOSTROZA, M. 2020. Deepened sleep makes hippocampal spatial memory more persistent. *Neurobiol Learn Mem*, 173, 107245.
- SAWANGJIT, A., OYANEDEL, C. N., NIETHARD, N., SALAZAR, C., BORN, J. & INOSTROZA, M. 2018. The hippocampus is crucial for forming non-hippocampal long-term memory during sleep. *Nature*, 564, 109-113.
- SILVESTRI, A. J. 2005. REM sleep deprivation affects extinction of cued but not contextual fear conditioning. *Physiol Behav*, 84, 343-9.
- SUTTON, B. C. & OPP, M. R. 2014. Sleep fragmentation exacerbates mechanical hypersensitivity and alters subsequent sleep-wake behavior in a mouse model of musculoskeletal sensitization. *Sleep*, 37, 515-24.
- VORSTER, A. P. & BORN, J. 2015. Sleep and Memory in Mammals, Birds and Invertebrates. *Neuroscience & Biobehavioral Reviews*, 50, 103-19.
- VORSTER, A. P., KRISHNAN, H. C., CIRELLI, C. & LYONS, L. C. 2014. Characterization of sleep in *Aplysia californica*. *Sleep*, 37, 1453-63.
- VORSTER, A. P. A. & BORN, J. 2017. Sleep supports inhibitory operant conditioning memory in *Aplysia*. *Learning & Memory*, 24, 252-256.
- VORSTER, A. P. A. & BORN, J. 2018. Wakefulness rather than sleep benefits extinction of an inhibitory operant conditioning memory in *Aplysia*. *Neurobiology of Learning and Memory*, 155, 306-312.
- VYAZOVSKIY, V. V., OLCESE, U., HANLON, E. C., NIR, Y., CIRELLI, C. & TONONI, G. 2011. Local sleep in awake rats. *Nature*, 472, 443-7.
- ZWAKA, H., BARTELS, R., GORA, J., FRANCK, V., CULO, A., GÖTSCH, M. & MENZEL, R. 2015. Context Odor Presentation during Sleep Enhances Memory in Honeybees. *Current Biology*, 25, 2869-2874.

## Figures

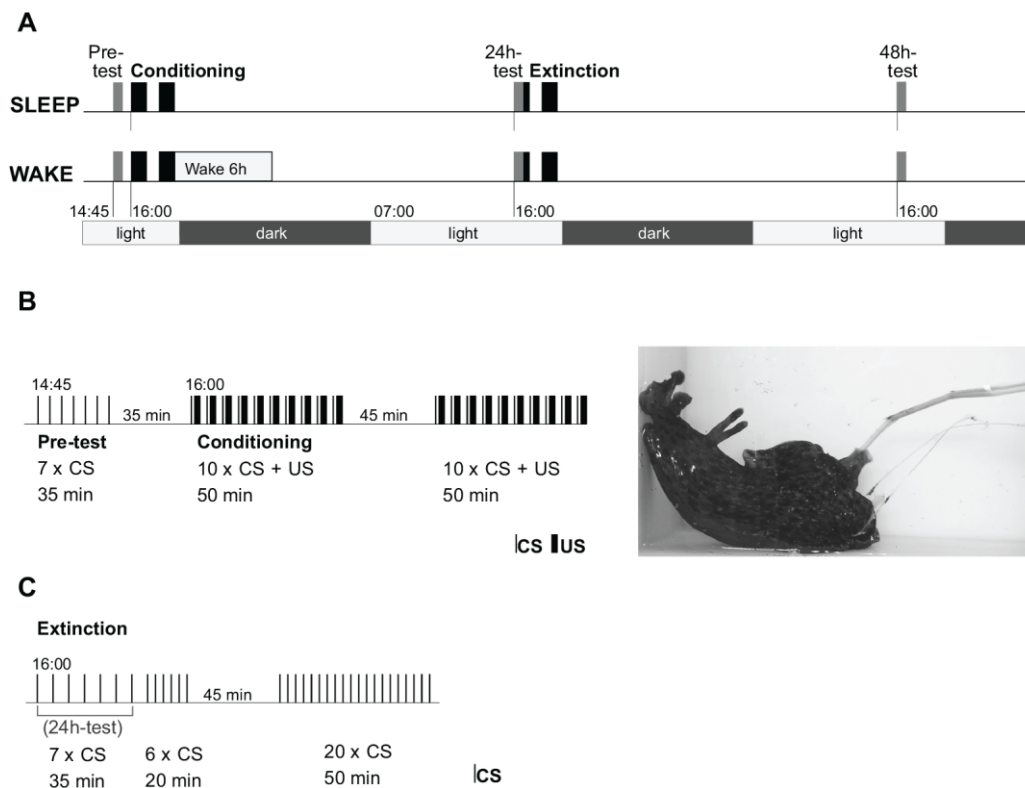

**Fig. 1. Experimental design and procedures.** (A) A SLEEP group and a WAKE group of *Aplysia* ( $n = 11$  for each group) were tested on three occasions: Pre-test, 24h-test and 48h-test. Each of the tests consisted of 7 presentations of the conditioned stimulus (CS, stimulation of the siphon with a chopstick, photo underneath) with an inter-trial interval of 5 min. The Pre-test took place at 14:45 and 75 min before Conditioning training starting at 16:00. Conditioning in the WAKE group was followed by a 6-hour period of wakefulness induced through gentle handling. The 24h-test was extended into an Extinction training. Both Conditioning and Extinction training were timed such that they ended shortly before the dark phase (19:00). (B) Conditioning started at 16:00 (~35 min after the last Pre-test trial) and comprised 2 blocks of 10 trials (paired stimulations), separated by 45 min. The inter-trial interval was 5 min, the inter-stimulus interval between CS and unconditioned stimulus (US, electrical shock) presentation was 0.5 s. (C) Extinction training started at 16:00 and integrated the 7 trials of the 24h-test (inter-trial interval 5 min) followed by 6 CS presentations with an interval-trial interval of 2.5 min and – after a 45-min break – a second block of 20 CS presentations (inter-trial interval 2.5 min).

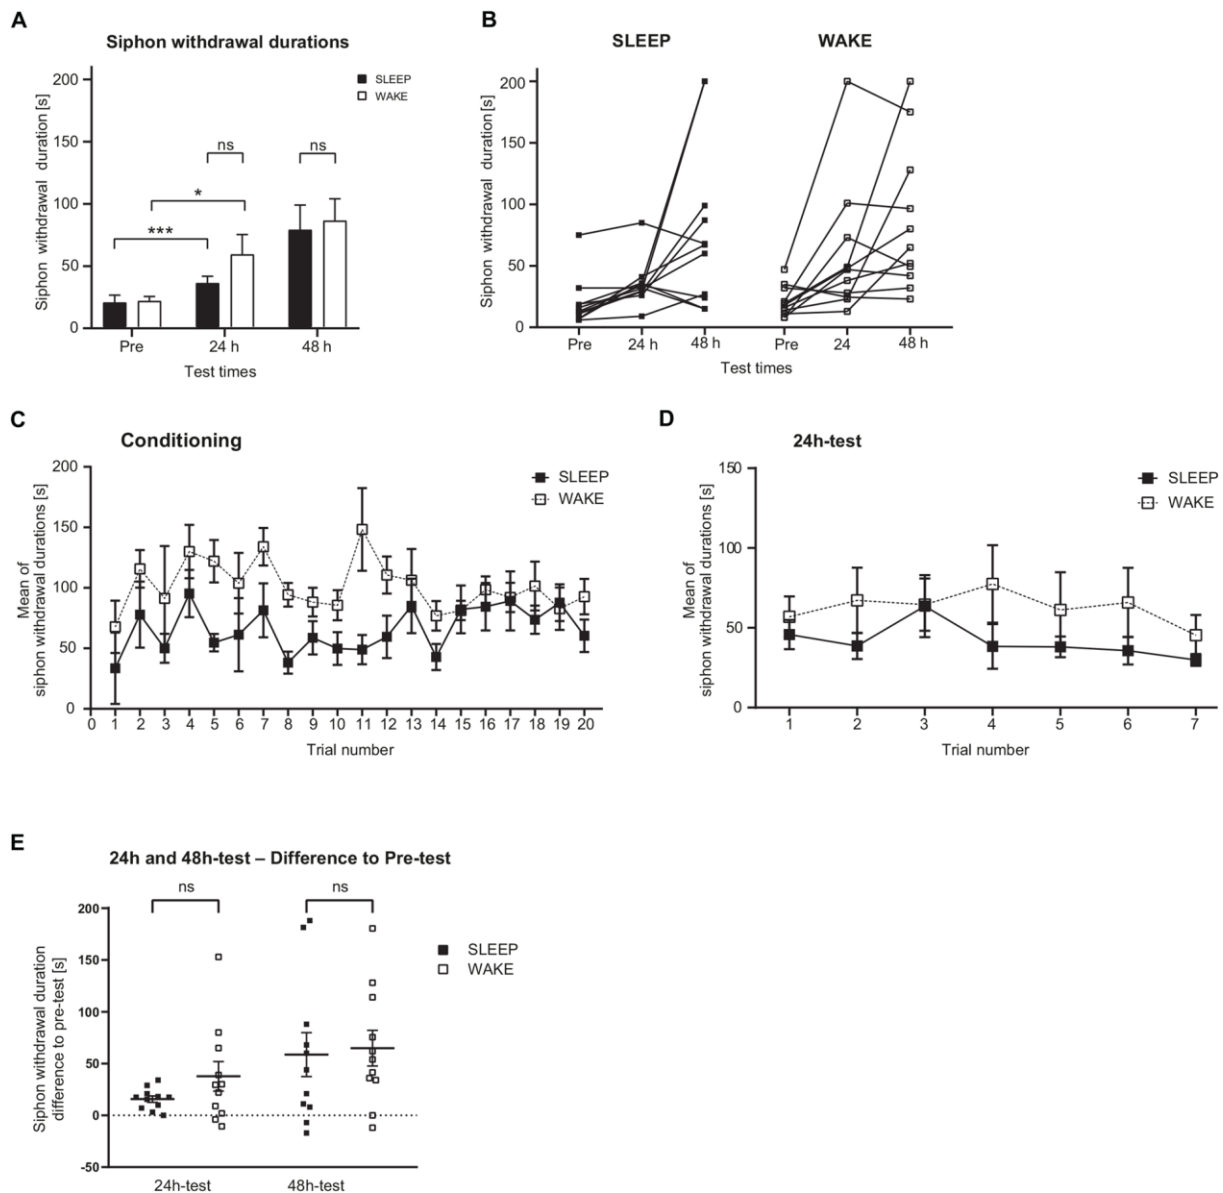

**Fig. 2. Siphon withdrawal conditioning induces long-term memory at the 24h-test which survives extinction and is still present at the 48h-test.** (A) Both SLEEP and WAKE group animals show prolonged siphon withdrawal durations after conditioning training (means  $\pm$  SEMs are indicated for Pre-test, 24-h and 48h-test). (B) Individual animal's withdrawal durations at the Pre-test, 24h-test and 48h-test. Each data point represents the median of 7 withdrawal durations measured at each test. (C) Mean  $\pm$  SEM siphon withdrawal durations in the SLEEP group (black squares) and WAKE groups (open squares) for each trial of the conditioning training and (D) of the extinction training. There were no significant differences between groups or significant changes over trials during conditioning or extinction ( $p > 0.05$ ; see text). (E) SLEEP (black squares) and WAKE groups (open squares) show

similar increases in withdrawal durations at the 24h and 48h-tests compared to Pre-test. Data points show difference in median withdrawal durations, with Pre-test values subtracted from median durations at the 24h-test and 48h-test, respectively, for each animal. Group means (horizontal lines)  $\pm$ SEMs (whiskers) are indicated. Withdrawal durations are further prolonged at the 48h-test compared to the 24h-test ( $p = 0.016$ , see text). Differences between groups were not significant (ns).

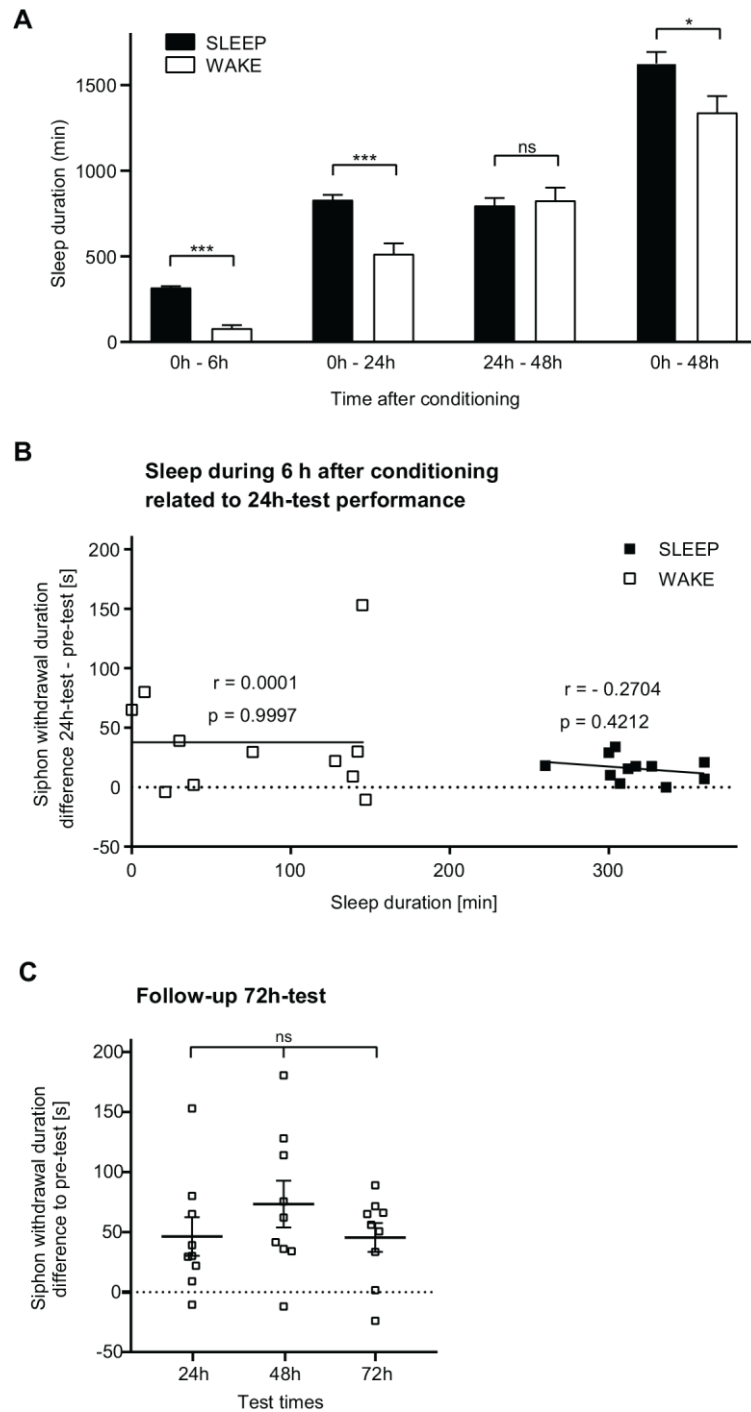

**Fig. 3. Sleep after conditioning and extinction training.** (A) Mean  $\pm$  SEM sleep duration in SLEEP group (black bars) and WAKE group (empty bars) animals. WAKE animals were effectively kept awake during the 6-h interval after conditioning (0-6 h). The difference in sleep duration between SLEEP and WAKE groups persisted for the 24-hour interval following conditioning (0-24 h) as well as for the 48-hour interval following conditioning (0-48 h), with the latter including the 24-hour interval following extinction where sleep duration was comparable between groups.\*\*\*  $p < 0.001$ , \*  $p$

< 0.05. (B) Correlations between sleep duration and siphon withdrawal duration (at 24h-test minus Pre-test level) separately for the SLEEP (black squares) and WAKE group (empty squares). (C) Exploratory follow-up 72h-test of conditioning memory in the a WAKE sub-group of n = 9 animals. Withdrawal duration (measured as difference to Pre-test levels) remained enhanced in this group at all tests, the 24h, 48h, and 72h-test. Means (horizontal lines)  $\pm$  SEMs (whiskers) are indicated. Response durations differ significantly from Pre-test levels at all three tests, but do not differ between each other ( $p > 0.0675$ , see text).



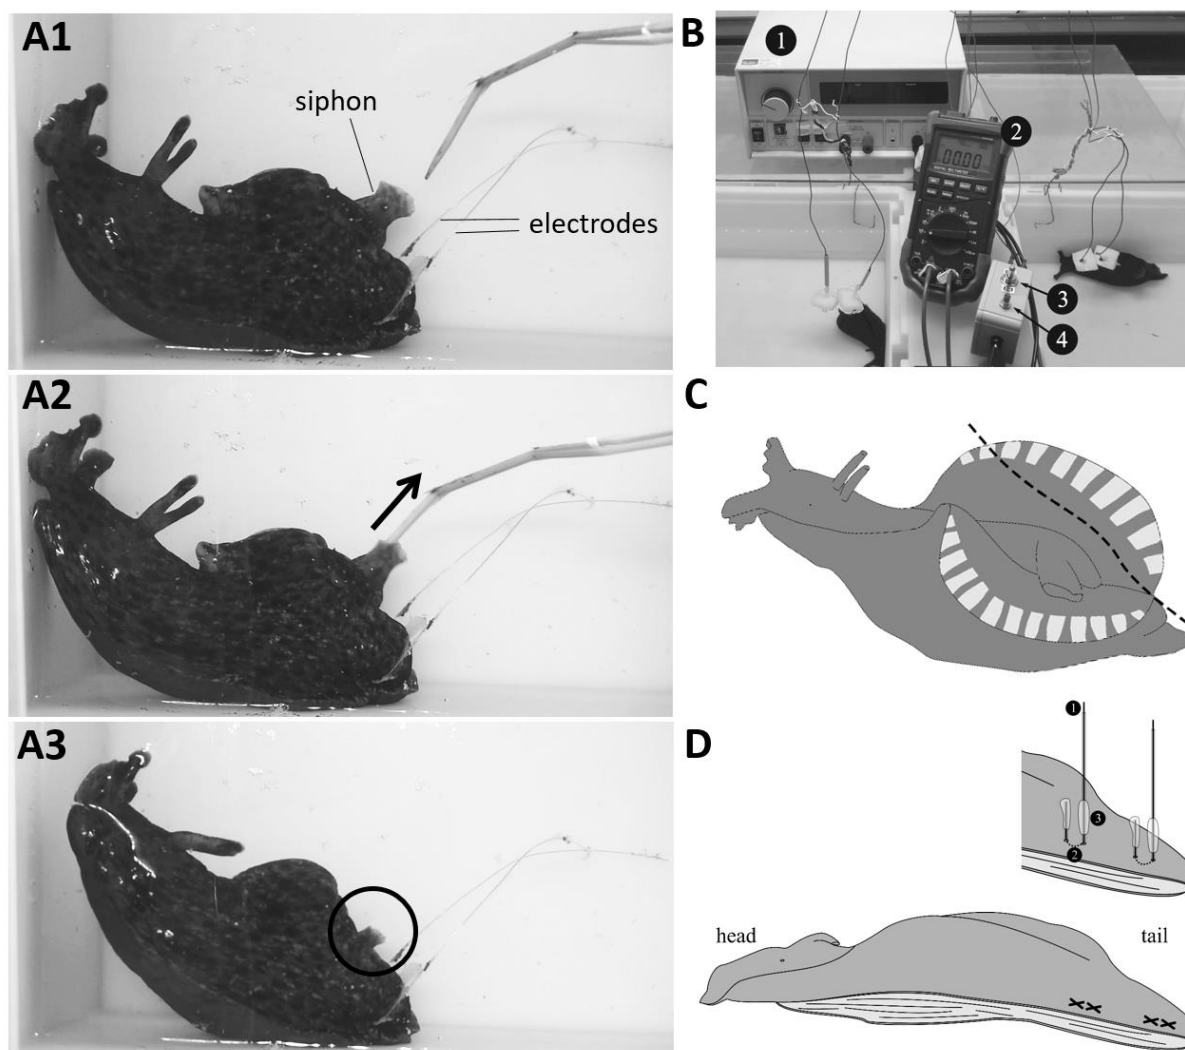

**Fig. S1. A.** Release of the siphon withdrawal reflex. A bent wooden chop stick was inserted into the siphon of *Aplysia* and in an upward and outward movement (A2), the inner upper skin was stimulated (A2). In naïve animals, this triggered a short withdrawal of the siphon (A3). **B.** Apparatus used for stimulation of two animals via electric shocks. (1) A power supply, (2) digital multimeter to monitor current flow at every single US application, (3) flip switch to select respective animal for stimulation, (4) manual pressure switch to activate current flow for auditory guided stimulation duration of 1s. **C.** Parapodectomy. The white shining marking at the upper part of the parapodia served as a guideline for cutting. **D.** Electrode position (X) at a relaxed *Aplysia* during cold-anesthesia and *Aplysia* tail with two implanted electrodes connected to the circuit on the long end where the isolation had been removed (1). The electrode was bent, as to the bare contact area (2) stayed inside the animal tissue. After implantation, the electrode was secured with a drop of hot glue (3) on both sides not touching the animal skin.

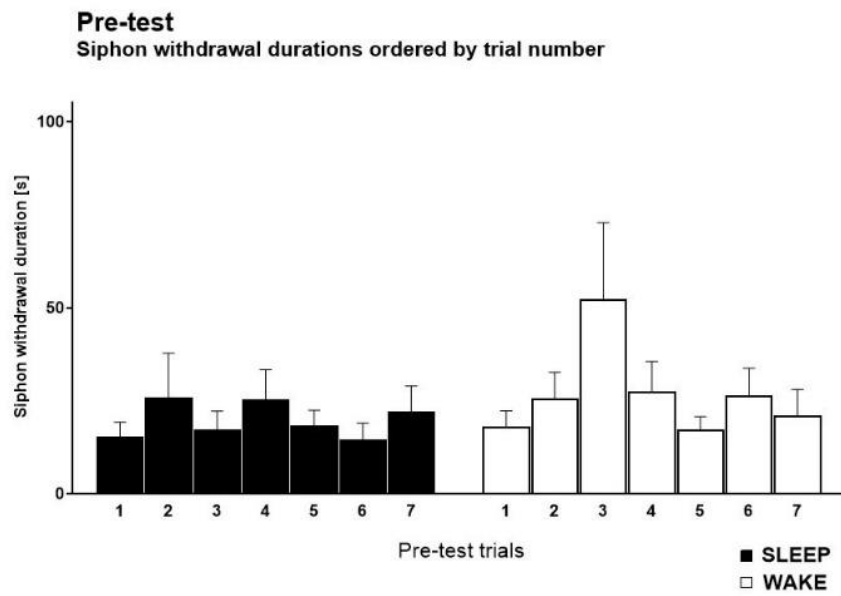

**Fig. S2.** Siphon withdrawal duration during the pretest for the two experimental groups of animals (SLEEP group, N=11, WAKE group N=11). We did not find evidence for habituation in course of the pretest.

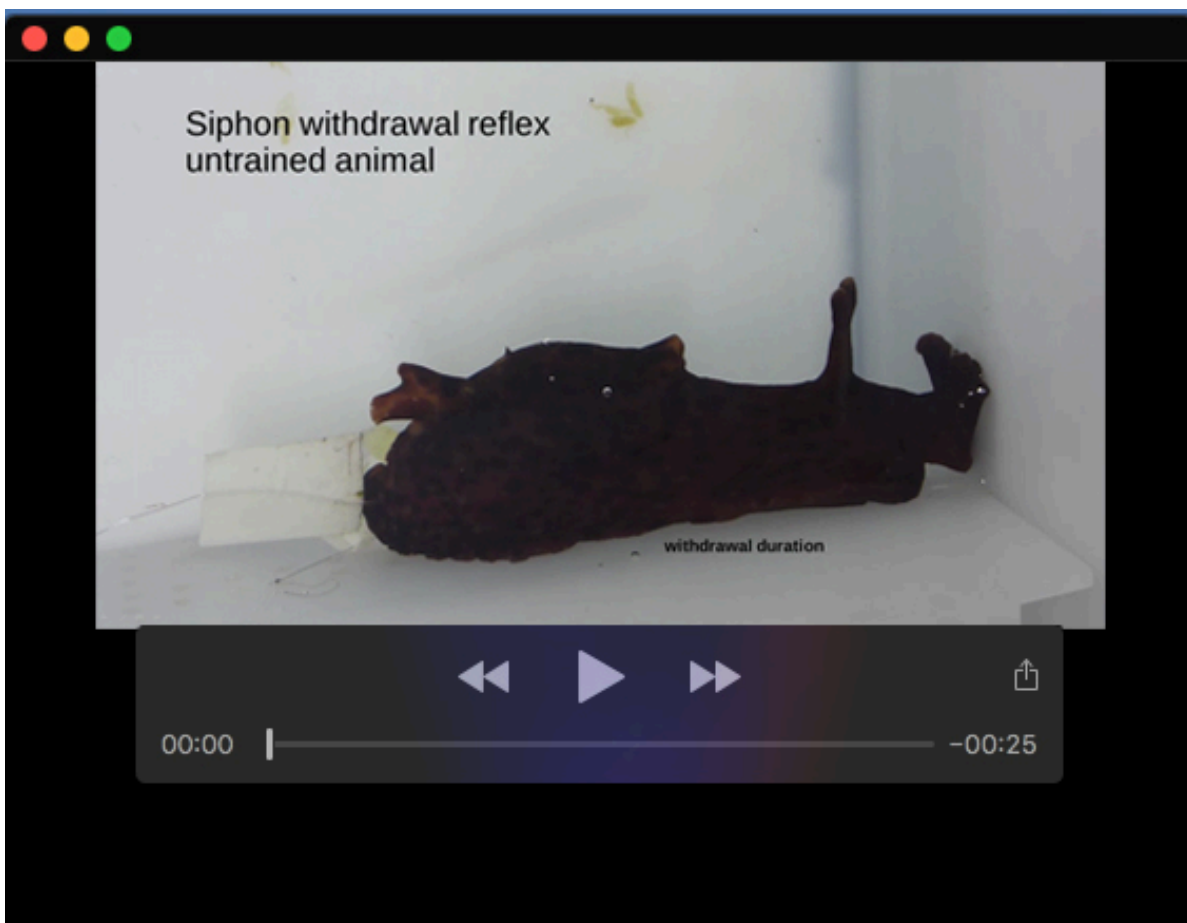

**Movie 1.**
